# Supplementary material for: Does the copepod community of the Ganges River estuary of India indicate ecological stress?
Source: Research Square preprint supplement (doi:10.21203/rs.3.rs-612106/v1), 2021-06-14
Supplement: Supplementary file 1 [file c31fc7b17abeeb6f7b9c1905.docx]

**Highlights**

- Copepod community of Ganges River estuary was studied from 2019 to 2020
- Abundance, diversity and dominance of copepods were less affected by space-time
- Copepods were not much affected by abiotic change, season and COVID-19 lockdown
- Copepods are less suitable indicators of ecological stresses of river-estuaries
